# Supplementary material
Source: PubMed Central journal article supplement (PMC4918759)
Supplement: NIHMS771539-supplement-2.pdf [file NIHMS771539-supplement-2.pdf]

|                   |                                                                      |                       |
|-------------------|----------------------------------------------------------------------|-----------------------|
| (2) H. sapiens    | LALNDCHAEIISRRSLRFLYTLQLELYLNNKDD-QKESIFQKSE--RGGFRLKENVQFHL         | 444                   |
| (2) D. opalescens | FAVNDCHAEIITARRCFLRFIYDQLELHLSDNAEVRGQSIFELRD--AGGYKLPNIQFHL         | 410                   |
| (2) R. norvegicus | LALNDCHAEIISRRSLRFLYAQLELYLNNKED-QKKSIFQKSE--RGGFRLKDTVQFHL          | 444                   |
| (2) M. musculus   | LALNDCHAEIISRRSLRFLYAQLELYLNNKED-QKKSIFQKSE--RGGFRLKDTVQFHL          | 444                   |
| (2) X. laevis     | LALNDCHAEIISRRSLRFLYTLQLELFLSTKED-QQKSIFMKSE--RGGYKLDNVQFHL          | 443                   |
| (2) O. hannah     | LALNDCHAEIITARRCLKFLYTLQLELHLSNKED-QQKSIFIKSE--QGGFKLDENVQFHL        | 449                   |
| (2) G. gallus     | LALNDCHAEIISRRCLKFLYTLQLELYLSNKDD-QEKSIFIKSE--RGGFKLKENVQFHL         | 445                   |
| (2) C. anna       | LALNDCHAEIISRRCLKFLYTLQLELYLSNKDD-QQKSIFIRSE--RGGFKLKENVQFHL         | 443                   |
| (2) D. rerio      | LALNDCHAEIITARRSLIRYLYNQLEYFLSDSTEEHEKSI FRWCS--EHGYRLKDDIQFHL       | 464                   |
| (2) T. rubripes   | LALNDCHAEIVARRSLIRYLYSQLEHFLSNHEEEHHKSMFTRCE--KKQGFRLKENVQFHL        | 438                   |
| D. melanogaster   | AVLNDSHAEIVSRRCLKLYLAQLDLQCNQATA--YQSIFVRNTDGGYPYKLSGVHFFHL          | 416                   |
| A. mellifera      | GALNDCHAEVARRCLCEYFLYQLELHTEEDRAA--ES-IL--EPAKKGFLKQGGIFHL           | 365                   |
| (1) O. hannah     | ETVNDCHAEIISRRGFLRFLYNELMAFDPL---ATEESIFQLAE--DGKLIKDDVSFHL          | 544                   |
| (1) T. rubripes   | DTVNDCHAEIISRRGFVRVFYSEILKYQDQD---NDDCIFEPAE--NNKLVKPDITFHL          | 913                   |
| (1) G. gallus     | ETVNDCHAEIISRRGFVRFYSELKMYDPCPKPS-AEESIFEPAG--GRRLKIKSSITFHL         | 585                   |
| (1) C. anna       | ETVNDCHAEIISRRGFVRFYSELKMYDPSNPSSAEDSIFEPAG--GNRLKIKSSITFHL          | 783                   |
| (1) D. rerio      | DTVNDCHAEIISRRGFIRFLYSELMKHWES---PGDETIFELAG--DGKLIKSDITFHL          | 1076                  |
| (1) X. laevis     | ETVNDCHAEIVSRRGFIRFLYSELKMYNPD---VPGDSIFEEAD--GDLLRVRPGVTFHL         | 858                   |
| (1) H. sapiens    | ETVNDCHAEIISRRGFIRFLYSELKMYNSQ---TAKDSIFEPAK-GGEKLQIKKTVSFHL         | 959                   |
| (1) M. musculus   | ETVNDCHAEIISRRGFIRFLYSELKMYNHH---TAKNSIFELAR-GGEKLQIKKTVSFHL         | 882                   |
| (1) R. norvegicus | ETVNDCHAEIISRRGFIRFLYSELKMYNHH---TAKNSIFELAR-GGEKLQIKKTVSFHL         | 364                   |
| (3) D. labrax     | QVVNDCHAEVTARRALLRFLYSQLELFLSKRPEDWEESIFVRHK--ECGYRLRDNVHFHM         | 467                   |
| (3) C. anna       | LAVNDCHAEIVARRAFVHFLYSQLELHLSKRREDWERSIFVRLK--EGGYRLRENILFHL         | 356                   |
| (3) H. sapien     | LVVNDCHAEVARRAFVHFLYSQLELHLSKRREDSERSIFVRLK--EGGYRLRENILFHL          | 483                   |
| (3) M. musculus   | LVVNDCHAEIVARRAFVHFLYSQLELHLSKQEDPERSIFIRLK--EGGYRLRENILFHL          | 489                   |
| (3) R. norvegicus | LVVNDCHAEIVARRAFVHFLYSQLELHLSKQEDPERSIFIRVK--EGGYRLRENILFHL          | 490                   |
|                   | ..**.*:** : ** : . : * : :                                           | : :      : :      * : |
| (2) H. sapiens    | YISTSPCGDARIFSPHEPI-----LEEPADRHFNPKARGQLRTKIESGEGTIPVRSNASI         | 499                   |
| (2) D. opalescens | YISTAPCGDARIFSPHGQD-----VETGDRHPNPKARGQLRTKIESGEGTIPVRSNGFI          | 464                   |
| (2) R. norvegicus | YISTSPCGDARIFSPHEPV-----LEEPADRHFNPKARGQLRTKIESGEGTIPVRSNASI         | 499                   |
| (2) M. musculus   | YISTSPCGDARIFSPHEPV-----LEEPADRHFNPKARGQLRTKIESGEGTIPVRSNASI         | 499                   |
| (2) X. laevis     | YISTSPCGDARIFSPHEVG-----QEDQGDRHPNPKARGQLRTKIESGEGTIPVRSSTI          | 498                   |
| (2) O. hannah     | YISTSPCGDARIFSPHEAA-----QEDQGDRHPNPKARGQLRTKIESGEGTIPVRSSTTI         | 504                   |
| (2) G. gallus     | YISTSPCGDARIFSPHEAA-----QEDQGDRHPNPKARGQLRTKIESGEGTIPVRSSTTI         | 500                   |
| (2) C. anna       | YISTSPCGDARIFSPHEAA-----QEDQGDRHPNPKARGQLRTKIESGEGTIPVRSSTTI         | 498                   |
| (2) D. rerio      | YISTSPCGDARIFSPHEAG-----AEDQGDRHPNPKARGQLRTKIESGEGTIPVRSNTI          | 519                   |
| (2) T. rubripes   | YISTSPCGDARIFSPHEAG-----VEDQGDRHPNPKARGQLRTKIESGEGTIPVRSNTI          | 493                   |
| D. melanogaster   | YINTAPCGDARIFSPHEND-----TGVDKHPNPKARGQLRTKIESGEGTIPVKSSDGI           | 469                   |
| A. mellifera      | YINTAPCGDARIFSPHEEN-----ESVDKHPNRRARGQLRTKIESGEGTIPVKSSEGI           | 418                   |
| (1) O. hannah     | YISTAPCGDGFALFDKSCSEQANTAGEDQHQLFENPKQGKLRITKVENGEGTIPVSSDIV         | 604                   |
| (1) T. rubripes   | YISTAPCGDGFALFDKSCSETGDEI--KGHQPLFENVKQGKLRITKVENGEGTIPVSSAIV        | 971                   |
| (1) G. gallus     | YISTAPCGDGFALFDKSCSDQASVVGPAEHPQLFENSKQGKLRITKVENGEGTIPVSSDIV        | 645                   |
| (1) C. anna       | YVSTAPCGDGFALFDKSCSDQASVVGQTHQPLFENPKQGKLRITKVENGEGTIPVSSDIM         | 843                   |
| (1) D. rerio      | YISTAPCGDGFALFDKSCSEAAE-LNGSGHMPLEFENIKQGKLRITKVENGEGTIPVSSDIV       | 1135                  |
| (1) X. laevis     | YISTAPCGDGFALFDKSCSDQPSAEGDNKHCPIFENVKQGKLRITKVENGEGTIPVSSDIV        | 918                   |
| (1) H. sapiens    | YISTAPCGDGFALFDKSCSDRAMESTESRHYPVFENPKQGKLRITKVENGEGTIPVSSDIV        | 1019                  |
| (1) M. musculus   | YISTAPCGDGFALFDKSCSDRAVESTESRHYPVFENPKQGKLRITKVENGEGTIPVSSDIV        | 942                   |
| (1) R. norvegicus | YISTAPCGDGFALFDKSCSDRAVESTESRHYPVFENPKQGKLRITKVENGEGTIPVSSDIV        | 424                   |
| (3) D. labrax     | YISTSPCGDGRLNSPYEIT--TDLHSSRHL---MRKHRSHLRTKIESGEGTIPVVRGRGSV        | 522                   |
| (3) C. anna       | YVSTSPCGDARLNSPYEIT--TDLNSSKHI---VKKYRGLHRTKIESGEGTIPVVRCHNAA        | 411                   |
| (3) H. sapien     | YVSTSPCGDARLNSPYEIT--TDLHSSKHL---VRKFRGLHRTKIESGEGTIPVVRGPSAV        | 538                   |
| (3) M. musculus   | YVSTSPCGDARLNSPYEIT--TDLNSSKHI---VRKFRGLHRTKIESGEGTIPVVRGPSAV        | 544                   |
| (3) R. norvegicus | YVSTSPCGDARLNSPYEIT--TDLNSSKHI---VRKFRGLHRTKIESGEGTIPVVRGPSAV        | 545                   |
|                   | *.:**.*:** : .      *      .      .:**.*:**.*:**.*:**.*:**.*:**.*:** |                       |

|                   |                                                               |      |
|-------------------|---------------------------------------------------------------|------|
| (2) H. sapiens    | QTDWGVLQGERLLTMSCSDKIARWNVVGIQGSLLSIFVEPIYFSSIIILGSLYHGDHLSRA | 559  |
| (2) D. opalescens | QTDWGVLEGERLLTMSCSDKIARWNVVGIQGSLLSIFVEPIYFSSIIILGSLYHSDHLSRA | 524  |
| (2) R. norvegicus | QTDWGVLQGERLLTMSCSDKIARWNVVGIQGSLLSIFVEPIYFSSIIILGSLYHGDHLSRA | 559  |
| (2) M. musculus   | QTDWGVLQGERLLTMSCSDKIARWNVVGIQGSLLSIFVEPIYFSSIIILGGLYHGDHLSRA | 559  |
| (2) X. laevis     | QTDWGVLQGERLLTMSCSDKLARWNVVGIQGSLLSIFVEPIYLSIIILGSLYHGDHLSRA  | 558  |
| (2) O. hannah     | QTDWGVLQGERLLTMSCSDKIARWNVVGIQGSLLSIFVEPIYLSIIILGSLYHGDHLSRA  | 564  |
| (2) G. gallus     | QTDWGVLQGERLLTMSCSDKIARWNVVGIQGSLLSIFVEPIYFSSIIILGSLYHGDHLSRA | 560  |
| (2) C. anna       | QTDWGVLQGERLLTMSCSDKIARWNVVGIQGSLLSIFVEPIYFSSIIILGSLYHGDHLSRA | 558  |
| (2) D. rerio      | QTDWGVLQGERLLTMSCSDKIARWNVVGIQGSLLSYFTEPIYFSSIIILGSLYHADHLSRA | 579  |
| (2) T. rubripes   | QTDWGVLQGERLLTMSCSDKIARWNVVGFQGSLSYFTEPIYFSSIIILGSLYHADHLSRA  | 553  |
| D. melanogaster   | QTDWGVLQGERLLTMSCSDKIARWNVVGIQGSLLSIIIEPVYLHSIVLGSLLHPEHMYRA  | 529  |
| A. mellifera      | QTDWGVLMGQRLTMSCSDKIARWNVVGIQGSLLSYFIEPIYFHSIVLGSLLNPSHMYRA   | 478  |
| (1) O. hannah     | PTWDGIQHGERLRTMSCSDKILRWNV-----                               | 630  |
| (1) T. rubripes   | PTWDGIQHGERLRTMSCSDKILRWNVVGLQGALLSHFINPIYLSITLGYLYSHGHLTRA   | 1031 |
| (1) G. gallus     | PTWDGIQHGERLRTMSCSDKILRWNVVGLQGALLSHFIEPVYLSVTLGYLYSQGHLTR    | 705  |
| (1) C. anna       | PTWDGIQHGERLRTMSCSDKILRWNVVGLQGALLSHFMEPVYLSVTLGYLYSQGHLTR    | 903  |
| (1) D. rerio      | PTWDGIQHGERLRTMSCSDKILRWNVVGLQGALLTHFIHPIYLSITLGYLYSHGHLTRA   | 1195 |
| (1) X. laevis     | PTWDGIQHGERLRTMSCSDKILRWNVVGLQGALLTHFMEPVYLSVTLGYLYSKGHLTR    | 978  |
| (1) H. sapiens    | PTWDGIRLGERLRTMSCSDKILRWNVVGLQGALLTHFLQPIYLSVTLGYLYSQGHLTR    | 1079 |
| (1) M. musculus   | PTWDGIRLGERLRTMSCSDKILRWNVVGLQGALLTHFLQPVYLSVTLGYLYSQGHLTR    | 1002 |
| (1) R. norvegicus | PTWDGIRLGERLRTMSCSDKILRWNVVGLQGALLTHFLQPVYLSVTLGYLYSQGHLTR    | 484  |
| (3) D. labrax     | QTDWGVLLGQEQLITMSCTDKIARWNVVGLQGALLSHFVEPVYLSVTVGSLRHTGHLGRV  | 582  |
| (3) C. anna       | QTDWGVLLGQEQLITMSCTDKIARWNVVGLQGALLSFFIEPMLHSIIVGSLYHTGHLGRV  | 471  |
| (3) H. sapien     | QTDWGVLLGQEQLITMSCTDKIARWNVVGLQGALLSHFVEPVYLSIIVGSLHHTGHLARV  | 598  |
| (3) M. musculus   | QTDWGVLLGQEQLITMSCTDKIASWNVVGLQGALLCHFIEPVYLSIIVGSLHHTGHLARV  | 604  |
| (3) R. norvegicus | QTDWGVLLGQEQLITMSCTDKIASWNVVGLQGALLCHFIEPVYLSIIVGSLHHTGHLARV  | 605  |

\*\*\*\*: \*::\* \*\*\*\*:\*\*: \*\*:

|                   |                                                                 |      |
|-------------------|-----------------------------------------------------------------|------|
| (2) H. sapiens    | MYQRISN-----IEDLPPLYTLNKPPLLSGISNA-EARQPGKAPNFSVNWTVGDS-AIEVI   | 612  |
| (2) D. opalescens | VYCRIAA-----IENLPDLFRLNRPFLSGISSP-ESRQPGKAPNFGINWRRND-SFEVI     | 577  |
| (2) R. norvegicus | MYQRISN-----IEDLPPLYTLNKPPLLSGISNA-EARQPGKAPNFSVNWTVGDT-AIEVI   | 612  |
| (2) M. musculus   | MYQRISN-----IEDLPPLYTLNKPPLLSGISNA-EARQPGKAPNFSVNWTVGDA-TIEVI   | 612  |
| (2) X. laevis     | VYQRISD-----IEDLPILYALNKPPLLSGISNA-EARQPGKAPSFVNWTVGDL-SLEVI    | 611  |
| (2) O. hannah     | AYQRIAE-----IEDLPSLYVLNRPPLLSGISNA-EARQPGKAPNFSVNWTVGDA-GLEVI   | 617  |
| (2) G. gallus     | VYQRIAE-----IEDLPPLYTLNRPPLLSGISNA-EARQPGKAPNFSVNWTVGDT-GLEVI   | 613  |
| (2) C. anna       | VYQRIAE-----IEDLPPLYTLNRPPLLSGISNA-EARQPGKAPNFSVNWTVGDT-GLEVI   | 610  |
| (2) D. rerio      | MYQRIAD-----MDDIPPPFRINRPPLLSGISNT-EARQPGKAPNFSVNWTVGDT-GLEII   | 632  |
| (2) T. rubripes   | MYQRITD-----IEDLPQSFSLNRPPLLSGISNA-EARQPGKAPNFRVNWTVGDT-GLKVI   | 606  |
| D. melanogaster   | VCGRIEKS----IQGLPPPYHLNKPRLALVTS-AEPRNQAKAPNFGINWTIGDT-ELEV     | 583  |
| A. mellifera      | VCGRIENT----IQGLPPPYRLNKPMLSLITSS-EVRQPGKAPNFSVNWTIGQL-EAEVI    | 532  |
| (1) O. hannah     | -----GRVSVYDSARQTGKTKESSINWCLPDGTSVEIL                          | 663  |
| (1) T. rubripes   | VCCRMATNGQEFAQSLAPFMLNHPEVGRVSVYDSTRHTGKTKESSVNWSFPDQHSVEVL     | 1091 |
| (1) G. gallus     | ICCRVLRDGDVQLKRLQAPYQINHPVEVGRVSVYDSARQTGKTKESSVNWCLADGSKVEVL   | 765  |
| (1) C. anna       | ICCRVARERNVLQAKLQAPYHINHPEVGRVSVYDSARQTGKTKESSVNWCLADESEVEVL    | 963  |
| (1) D. rerio      | VCCRLSRDGDVFKSSLPANFTLNHPVEVGRVSVYDSTRHTSKTKESSVNWSQPDQYSVEVL   | 1255 |
| (1) X. laevis     | ICCRMSRDGDVAFQNLQPLDLYLVNHPVEVGRVSVYDSTRQTGKTKESSVNWCLADE-EAEVL | 1037 |
| (1) H. sapiens    | ICCRVTRDGSFAFEDGLRHPFIVNHPKVGSRVSIYDSKRQSGKTKETS VNWCLADGYDLEIL | 1139 |
| (1) M. musculus   | ICCRVTRDGGAFEDGLRYPFIVNHPKVGSRVSVYDSKRQSGKTKETS VNWCMADGYDLEIL  | 1062 |
| (1) R. norvegicus | ICCRVTRDGNFEDGLRYPFIVNHPKVGSRVSVYDSKRQSGKTKETS VNWCLADGYDLEIL   | 544  |
| (3) D. labrax     | LNQRLER-----LGPLPATHRRNQPLLSGLSSA-EYQQPGKASCVSVNWTGDT-QLLEV     | 635  |
| (3) C. anna       | MSHRIED-----IGQLPASVYRNRQLLSGVSHA-DARQPGKSPGFSVNWI VNT-DLEVI    | 524  |
| (3) H. sapien     | MSHRMEG-----VGQLPASVYRNRPLLSGVSDA-EARQPGKSPPFMNVVVGSA-DLEII     | 651  |
| (3) M. musculus   | MSHRMEG-----IGQLPASVYRNRPLLSGVSHA-EARQPGKSPHFSANWVVGSA-DLEII    | 657  |
| (3) R. norvegicus | MSHRMEG-----IGQLPASVYRNRPLLSGVSDA-EARQPGKSPHFSANWVVGSA-DLEII    | 658  |

. :. . :. . \* : \*\* . :. :

|                   |                                                               |      |
|-------------------|---------------------------------------------------------------|------|
| (2) H. sapiens    | NATTGKD-ELG--RASRLCKHALYCRWMRVHGKVPVSH--LLRSKITKPNVYHESKLAKEY | 668  |
| (2) D. opalescens | NAMTGRV-EGG--SMSRICKQALFDRFMNLYGKLSSL-TGQSVTTTRPALYSEAKATVMEY | 633  |
| (2) R. norvegicus | NATTGKD-ELG--RPSRLCKHALYCRWMRVHGKVPPH--LLRTKITKPTTYHESKLAKEY  | 668  |
| (2) M. musculus   | NATTGKD-ELG--RPSRLCKHALYCRWMRVHGKVPPH--LLRTKITKPTTYHESKLAAREY | 668  |
| (2) X. laevis     | NATTGKD-EMG--RASRLCKHALYSRWMMRIHAKLSSS--VRCKFGKPNVYHETKQSAVEY | 666  |
| (2) O. hannah     | NATTGKD-ELG--RASRLCKHALYTRWMRVYTKLPAS--LHSKVNKPNVYHETKQVAAEY  | 672  |
| (2) G. gallus     | NATTGKD-EMG--RASRLCKHALYSRWMMRIHAKLSSS--LRLKIFKPNLYHDTKQGATEY | 668  |
| (2) C. anna       | NATTGKD-EMG--RASRLCKHAFYSRWMMRIHAKLSSS--LRSKILKPNLYHETKQGAVEY | 665  |
| (2) D. rerio      | NATTGKH-DLG--RQSQCKHALYSRWVCLHAKLSET--LRIRGSRPGSYHEAKQGAVEY   | 687  |
| (2) T. rubripes   | NATTGKD-DLG--RPSRLCKHALYGRWMLRHSKLSPS--LRIRTVRPSYHEAKQAAVDY   | 661  |
| D. melanogaster   | NSLTGRT-IGG--QVSRITKQAFFVKYGFMLANLPGI--LV--RKVTTDYGGTKANVKDY  | 636  |
| A. mellifera      | NCTTGKD-ELG--KPSRISKQGLFRFRFYLLGKLSI--EDADKNQCRHYLDAKSSVQNY   | 587  |
| (1) O. hannah     | DGTGKGV-DGPKLDISRVSKQSLFQLFRMLCTKM----VRKDLKNFVVYSEAKESATDY   | 717  |
| (1) T. rubripes   | DGTTGKL-DGNKLSVSRVTKSNLFAFRVAVQRC-----GRDLSLHYSYQAKMAALS      | 1145 |
| (1) G. gallus     | DGTGKGV-DGPKLEVSRSVSKRRTFALFQQLCAKS-----DCKELQKLSVYSEAKAAVQY  | 819  |
| (1) C. anna       | DGTGKGV-DGPKLEVSRSVSKRRTFALFQQLCAKS-----NRGDLQSLSVYSDAKEAATAY | 1017 |
| (1) D. rerio      | DGTGKGL-DSPKMEVSRSVSKSNLFRFHALCQRA-----GRADLLALQSYAHAKMAATS   | 1309 |
| (1) X. laevis     | DGTGKGV-EGAKLEISRVSKLHMFTLFQELCLLR-----GRHDLALSSYSDVKATVGTY   | 1091 |
| (1) H. sapiens    | DGTRGTV-DGPRNELSRVSKKNIFFLQFKKCSFR-----YRDLRLLS-YGEAKKAARDY   | 1192 |
| (1) M. musculus   | DGTRGTV-DGPGKELSRVSKKNIFFLQFKKCSFR-----ARRDLLQLS-YGEAKKAARDY  | 1115 |
| (1) R. norvegicus | DGTRGTV-DGPGKELSRVSKKNIFFLQFKKCSFR-----ARRDLLQLS-YGEAKKAARDY  | 597  |
| (3) D. labrax     | NTATGRRRESG--TPSRLCKHALFTRWNRLYRKVRLGIHVSSADRQLMYCEAKMAARPY   | 693  |
| (3) C. anna       | NAMTKGR-TCG--SPSRLCKHMFTRWAKLHGKLS--TRTPSHGEMPSVYSEAKLVAQTY   | 579  |
| (3) H. sapien     | NATTGRR-SCG--GPSRLCKHVL SARWARLYGRLS--TRTPSPGDTPSMYCEAKLGAHTY | 706  |
| (3) M. musculus   | NAMTKGR-SCG--GSSRLCKHVFSAWARLHGRLS--TRIPSHGDTPSMYCEAKQGAHTY   | 712  |
| (3) R. norvegicus | NAMTKGR-SCG--GSSRLCKHVF SARWARLHGRLS--TRIPSHGDTPSMYCEAKRGAHTY | 713  |
|                   | : * * * * * : : * . * . :                                     |      |

|                   |                                                             |      |
|-------------------|-------------------------------------------------------------|------|
| (2) H. sapiens    | QAAKARLFTAFIKAGLGAWVEKPTEQDQFSLTP-----                      | 701  |
| (2) D. opalescens | QLAKQCVFQAFQKAGLGNWVQKPIEQDQFEMSLDAPAIQLKAAETETANTETSA----- | 687  |
| (2) R. norvegicus | QAAKARLFTAFIKAGLGAWVEKPTEQDQFSLTP-----                      | 701  |
| (2) M. musculus   | QAAKARLFTAFIKAGLGAWVEKPTEQDQFSLTP-----                      | 701  |
| (2) X. laevis     | QSAKECVFKVFQKTGLGAWVKKPIEQDQFSLNV-----                      | 699  |
| (2) O. hannah     | QTAKECLFKAFKAGLGAWVEKPPIEQDQFSLVV-----                      | 705  |
| (2) G. gallus     | QTAKECLFKAFKAGLGAWVEKPPIEQDQFSLTV-----                      | 701  |
| (2) C. anna       | QTAKECLFKAFKAGLGAWVEKPPIEQDQFSLTV-----                      | 698  |
| (2) D. rerio      | HEAKQTLFKAFYKAGLGAWVEKPPIEQDQFSLIP-----                     | 720  |
| (2) T. rubripes   | HSKQTLFKAFQKSGLGAWVKKPIEQDQFSLVTT-----                      | 694  |
| D. melanogaster   | QIAKLELFSAFKREDLGSWLKPIEQDEFGLAE-----                       | 669  |
| A. mellifera      | SLAKHQLEAFVKAHLGSWVKKPIEQDMFEVDI-----                       | 620  |
| (1) O. hannah     | QSAKQQFFWGLQEMGYGSWICKPQEEAFVLPPEAAPPFL-----                | 757  |
| (1) T. rubripes   | QLAKQQFFQALTAHGYGTWIGKPLEEKSFEAGESSWNNEASVP-----CGRRQQ----- | 1194 |
| (1) G. gallus     | QKAKQCFFSALEEMGYGSWICKPQEEENFIPDA-----                      | 853  |
| (1) C. anna       | QEAKQCFFSALEELGYGSWIKPQEEENFSL-----                         | 1048 |
| (1) D. rerio      | QEAKRFLFLALSQHYGAWIGKPLEEKSFEAGEAKSFEPMGSGDVQASGCVVDPNSFLSS | 1369 |
| (1) X. laevis     | QTARGQFFRQLEQMGYGNWISKPQEEKCFSLSI-----                      | 1124 |
| (1) H. sapiens    | ETAKNYFKKGLKDMGYGNWISKPQEEKNFYLCVPV-----                    | 1226 |
| (1) M. musculus   | DLAKNYFKKSLRDMGYGNWISKPQEEKNFYLCVPVND-----                  | 1152 |
| (1) R. norvegicus | DLAKNYFKKSLRDMGYGNWISKPQEEKNFYLCVPVND-----                  | 634  |
| (3) D. labrax     | QTVKQQWFRSLQETGLGTWVKKPPEQDQFLLTV-----                      | 726  |
| (3) C. anna       | QSVKQQLFKAFQKAGLGTWVKKPPEQDQFLLTV-----                      | 612  |
| (3) H. sapien     | QSVKQQLFKAFQKAGLGTWVKKPPEQDQFLLTL-----                      | 739  |
| (3) M. musculus   | QSVKQQLFKAFQKAGLGTWVKKPPEQDQFLLSL-----                      | 745  |
| (3) R. norvegicus | QSVKQQLFKAFQKAGLGTWVKKPPEQDQFLLSL-----                      | 746  |
|                   | .. : * * : * * * . *                                        |      |

|                 |              |      |
|-----------------|--------------|------|
| (2)H.sapiens    | -----        | 701  |
| (2)D.opalescens | -----        | 687  |
| (2)R.norvegicus | -----        | 701  |
| (2)M.musculus   | -----        | 701  |
| (2)X.laevis     | -----        | 699  |
| (2)O.hannah     | -----        | 705  |
| (2)G.gallus     | -----        | 701  |
| (2)C.anna       | -----        | 698  |
| (2)D.rerio      | -----        | 720  |
| (2)T.rubripes   | -----        | 694  |
| D.melanogaster  | -----        | 669  |
| A.mellifera     | -----        | 620  |
| (1)O.hannah     | -----        | 757  |
| (1)T.rubripes   | -----        | 1194 |
| (1)G.gallus     | -----        | 853  |
| (1)C.anna       | -----        | 1048 |
| (1)D.rerio      | ENNNFLSAAQGF | 1381 |
| (1)X.laevis     | -----        | 1124 |
| (1)H.sapiens    | -----        | 1226 |
| (1)M.musculus   | -----        | 1152 |
| (1)R.norvegicus | -----        | 634  |
| (3)D.labrax     | -----        | 726  |
| (3)C.anna       | -----        | 612  |
| (3)H.sapien     | -----        | 739  |
| (3)M.musculus   | -----        | 745  |
| (3)R.norvegicus | -----        | 746  |

**Supplementary table 2.** Sequences of DNA and RNA oligonucleotides used in methods.

**a) RNA sequences used for crystallography**

| RNA name           | RNA sequence            | Calculated/Observed monoisotopic mass(ESI) |
|--------------------|-------------------------|--------------------------------------------|
| Bdf2 8-aza-N TOP   | UUCCCCACAUUNGACGUUCAGUC | 7186.93/7187.09                            |
| Bdf2-C BOTTOM      | GACUGAACGACCAAUGUGGGGAA | 7472.6/7472.1                              |
| Bdf2-U BOTTOM      | GACUGAACGACCAAUGUGGGGAA | 7473.6/7473.6                              |
| GLI1-23mer 8AN TOP | GCUCGCGAUGCUNGAGGGCUCUG | 7376.98/7376.24                            |
| GLI1-23mer BOTTOM  | CAGAGCCCCCAGCAUCGCGAGC  | 7315.06/7306.18                            |

**b) Primers for site directed mutagenesis**

| Oligo name                            | Sequence                              |
|---------------------------------------|---------------------------------------|
| 3' end of ligated Gli1 top strand RNA | 5'-AXA GGG CUC UGC-3'                 |
| 5' end of ligated Gli1 top strand RNA | 5'-GCU CGC GAU GCU-3'                 |
| Gli1 bottom strand RNA                | 5'-GCA GAG CCC CYC AGC AUC GCG AGC-3' |
| DNA splint                            | 5'-GCA GAG CCC TYT AGC ATC GCG AGC-3' |

**c) RNA sequences used for in vitro deamination kinetics**

| Mutant | Forward primer                                | Reverse primer                               |
|--------|-----------------------------------------------|----------------------------------------------|
| R510Q  | GGTGCTGCAAGGGGAGCAACTGCTCACCATGTCC            | GGACATGGTGAGCAGTTGCTCCCCTGCAGCACC            |
| R510A  | GGTGCTGCAAGGGGAGGCTCTGCTCACCATGTCC            | GGACATGGTGAGCAGAGCCTCCCCTGCAGCACC            |
| G593A  | GCAGAAGCACGGCAGCCAGCTAAGGCCCCCAACTTCA<br>GTG  | CACTGAAGTTGGGGGCCTTAGCTGGCTGCCGTGCTTCT<br>GC |
| G593E  | GCAGAAGCACGGCAGCCAGAAAAGGCCCCCAACTTCA<br>GTG  | CACTGAAGTTGGGGGCCTTTTCTGGCTGCCGTGCTTCT<br>GC |
| K594A  | CAGAAGCACGGCAGCCAGGGGCTGCCCCCAACTTCA<br>GTGTC | GACACTGAAGTTGGGGGCAGCCCTGGCTGCCGTGCTT<br>CTG |
| R348A  | CTTCTCCTCCCCTCACGCTGCAAGAAAAGTGCTGGCT<br>GG   | CCAGCCAGCACTTTTCTTGCAGCGTGAGGGGAGGAGAA<br>G  |

**d) primers used for mutagenesis of hGLI1 in vitro transcription template**

| 3' nearest neighbor mutant | Forward primer                                                                    | Reverse primer                                                                    |
|----------------------------|-----------------------------------------------------------------------------------|-----------------------------------------------------------------------------------|
| G to C                     | GTCTACTCACCACAGCCCCGAGCATCACTGAG<br>AATGCTGCCATGGATGCTACAGGGCTACAGGAA<br>GAGCCAG  | CTGGCTCTTCTGTAGCCCTGTAGCATCCATGGCAG<br>CATTCTCAGTGATGCTGCGGGGCTGTGGTGAGTAG<br>AC  |
| G to A                     | GTCTACTCACCACAGCCCCCAGCATCACTGAGA<br>ATGCTGCCATGGATGCTAAGGGCTACAGGAAG<br>AGCCAG   | CTGGCTCTTCTGTAGCCCTTTAGCATCCATGGCAG<br>CATTCTCAGTGATGCTGAGGGGCTGTGGTGAGTAGA<br>C  |
| G to U                     | GTCTACTCACCACAGCCCCACAGCATCACTGAG<br>AATGCTGCCATGGATGCTATAGGGCTACAGGAA<br>GAGCCAG | CTGGCTCTTCTGTAGCCCTATAGCATCCATGGCAG<br>CATTCTCAGTGATGCTGTGGGGGCTGTGGTGAGTAGA<br>C |

**e) RNA sequences used for EMSA binding experiments**

| RNA name           | RNA sequence             | Calculated/Observed monoisotopic mass(ESI) |
|--------------------|--------------------------|--------------------------------------------|
| GLI1-24mer 8AN TOP | GCUCGCGAUGCUNGAGGGCUCUGC | 7682.0/7681.9                              |
| GLI1-24mer BOTTOM  | GCAGAGCCCCCAGCAUCGCGAGC  | 7663.7/7663.4                              |
